# Supplementary material for: Physiochemical screening of road avenue plants in better landscape management of highly polluted urbanized city (Lahore), Pakistan
Source: PeerJ. 2025 Oct 31;13:e20121. doi: 10.7717/peerj.20121 (PMC12581913; doi:10.7717/peerj.20121)
Supplement: Supplemental Information 1 — Replicated values of all the parameters studied. [file peerj-13-20121-s001.xlsx]

## Sheet: Sheet1
Amount of dust
Alstonia scholaris	Polluted		Control
R1	0.019	C1	0.007
R2	0.02	C2	0.003
R3	0.021	C3	0.004
Bougainvillea spectabilis
R1	0.014	C1	0.002
R2	0.017	C2	0.005
R3	0.014	C3	0.006
Dalbergia sissoo
R1	0.011	C1	0.003
R2	0.014	C2	0.001
R3	0.017	C3	0.006
Eucalyptus globulus
R1	0.013	C1	0.004
R2	0.015	C2	0.007
R3	0.015	C3	0.011
Ficus benjamina
R1	0.011	C1	0.002
R2	0.01	C2	0.003
R3	0.013	C3	0.006
Ficus religiosa
R1	0.021	C1	0.002
R2	0.019	C2	0.004
R3	0.02	C3	0.006
Ficus virens
R1	0.012	C1	0.003
R2	0.017	C2	0.004
R3	0.019	C3	0.005
Morus alba
R1	0.015	C1	0.004
R2	0.019	C2	0.005
R3	0.026	C3	0.009
Murraya paniculata
R1	0.012	C1	0.006
R2	0.01	C2	0.003
R3	0.013	C3	0.007
Putranjiva roxburghii
R1	0.011	C1	0.002
R2	0.013	C2	0.004
R3	0.014	C3	0.006
Polyalthia longifolia
R1	0.013	C1	0.003
R2	0.016	C2	0.004
R3	0.019	C3	0.008
Rubia tinctorum
R1	0.012	C1	0.006
R2	0.011	C2	0.006
R3	0.016	C3	0.009

## Sheet: Sheet2
Leaf Area Index
Alstonia scholaris	Polluted		Control
R1	447.9	C1	1562
R2	627.8	C2	1698
R3	553.7	C3	1819
Bougainvillea spectabilis
R1	275.9	C1	496.3
R2	331.8	C2	558
R3	331	C3	542.7
Dalbergia sissoo
R1	214.99	C1	368.6
R2	194.6	C2	375
R3	403.53	C3	500.7
Eucalyptus globulus
R1	245.7	C1	448
R2	313.7	C2	468.9
R3	324.8	C3	392.9
Ficus benjamina
R1	307	C1	318.9
R2	229.9	C2	338.8
R3	236.6	C3	367.9
Ficus religiosa
R1	210.4	C1	298.1
R2	191.7	C2	307.5
R3	203.7	C3	332
Ficus virens
R1	998.1	C1	1681
R2	898.7	C2	1677
R3	979.7	C3	1652
Morus alba
R1	1042.6	C1	1125.6
R2	954.9	C2	1228
R3	996	C3	1165
Murraya paniculata
R1	99.98	C1	95.33
R2	79.99	C2	99.87
R3	86.61	C3	98.76
Putranjiva roxburghii
R1	397	C1	599.5
R2	497.6	C2	607.6
R3	595.4	C3	627.9
Polyalthia longifolia
R1	1043.6	C1	1098.6
R2	1140	C2	1217
R3	1030.2	C3	1232
Rubia tinctorum
R1	288	C1	349.3
R2	313.7	C2	375
R3	317.8	C3	329

## Sheet: Sheet3
Stomatal conductance
Alstonia scholaris	Polluted		Control
R1	0.02	C1	0.08
R2	0.03	C2	0.07
R3	0.07	C3	0.06
Bougainvillea spectabilis
R1	0.03	C1	0.15
R2	0.04	C2	0.13
R3	0.08	C3	0.17
Dalbergia sissoo
R1	0.04	C1	0.06
R2	0.03	C2	0.1
R3	0.04	C3	0.08
Eucalyptus globulus
R1	0.11	C1	0.07
R2	0.09	C2	0.09
R3	0.07	C3	0.1
Ficus benjamina
R1	0.15	C1	0.12
R2	0.19	C2	0.18
R3	0.17	C3	0.19
Ficus religiosa
R1	0.67	C1	0.49
R2	0.54	C2	0.57
R3	0.65	C3	0.68
Ficus virens
R1	0.17	C1	0.14
R2	0.22	C2	0.18
R3	0.2	C3	0.2
Morus alba
R1	0.13	C1	0.12
R2	0.16	C2	0.18
R3	0.17	C3	0.14
Murraya paniculata
R1	0.02	C1	0.11
R2	0.05	C2	0.14
R3	0.06	C3	0.16
Putranjiva roxburghii
R1	0.13	C1	0.14
R2	0.2	C2	0.12
R3	0.19	C3	0.2
Polyalthia longifolia
R1	0.06	C1	0.07
R2	0.1	C2	0.1
R3	0.08	C3	0.11
Rubia tinctorum
R1	0.07	C1	0.18
R2	0.09	C2	0.14
R3	0.08	C3	0.21

## Sheet: Sheet4
Transpiration Rate
Alstonia scholaris	Polluted		Control
R1	0.15	C1	0.2
R2	0.18	C2	0.31
R3	0.19	C3	0.26
Bougainvillea spectabilis
R1	0.16	C1	0.38
R2	0.19	C2	0.47
R3	0.21	C3	0.59
Dalbergia sissoo
R1	0.18	C1	0.22
R2	0.22	C2	0.42
R3	0.25	C3	0.34
Eucalyptus globulus
R1	0.21	C1	0.19
R2	0.32	C2	0.25
R3	0.27	C3	0.23
Ficus benjamina
R1	0.79	C1	0.8
R2	0.85	C2	0.86
R3	0.96	C3	0.91
Ficus religiosa
R1	0.58	C1	0.49
R2	0.65	C2	0.54
R3	0.78	C3	0.76
Ficus virens
R1	0.29	C1	0.33
R2	0.56	C2	0.5
R3	0.41	C3	0.42
Morus alba
R1	0.45	C1	0.35
R2	0.58	C2	0.52
R3	0.61	C3	0.59
Murraya paniculata
R1	0.25	C1	0.58
R2	0.19	C2	0.61
R3	0.28	C3	0.69
Putranjiva roxburghii
R1	0.29	C1	0.25
R2	0.35	C2	0.32
R3	0.38	C3	0.41
Polyalthia longifolia
R1	0.07	C1	0.11
R2	0.11	C2	0.14
R3	0.14	C3	0.16
Rubia tinctorum
R1	0.49	C1	1.47
R2	0.55	C2	1.59
R3	0.75	C3	1.78

## Sheet: Sheet5
Photosynthetic Rate
Alstonia scholaris	Polluted		Control
R1	19.24	C1	23.18
R2	24.59	C2	35.24
R3	32.25	C3	43.79
Bougainvillea spectabilis
R1	27.78	C1	28.89
R2	35.61	C2	36.98
R3	39.72	C3	41.77
Dalbergia sissoo
R1	18.23	C1	44.53
R2	28.23	C2	46.44
R3	38.25	C3	63.79
Eucalyptus globulus
R1	19.76	C1	18.96
R2	27.67	C2	26.76
R3	36.21	C3	37.22
Ficus benjamina
R1	53.21	C1	42.82
R2	67.44	C2	64.18
R3	49.17	C3	54.19
Ficus religiosa
R1	57.17	C1	41.45
R2	63.27	C2	61.12
R3	48.9	C3	50.12
Ficus virens
R1	34.22	C1	40.96
R2	43.19	C2	52.69
R3	55.83	C3	39.13
Morus alba
R1	67	C1	58.21
R2	74.01	C2	67.82
R3	48.02	C3	53.17
Murraya paniculata
R1	19.34	C1	37.32
R2	25.78	C2	47.19
R3	35.28	C3	50.91
Putranjiva roxburghii
R1	48.19	C1	66.14
R2	68.86	C2	53.05
R3	53.65	C3	54.55
Polyalthia longifolia
R1	35.23	C1	38.63
R2	41.49	C2	41.56
R3	50.09	C3	51.49
Rubia tinctorum
R1	20.44	C1	28.71
R2	39.17	C2	38.54
R3	32.2	C3	53.13

## Sheet: Sheet6
Chlorophyll a
Alstonia scholaris	Polluted		Control
R1	0.21	C1	0.32
R2	0.32	C2	0.43
R3	0.39	C3	0.41
Bougainvillea spectabilis
R1	0.34	C1	0.45
R2	0.45	C2	0.54
R3	0.51	C3	0.58
Dalbergia sissoo
R1	0.46	C1	0.51
R2	0.57	C2	0.65
R3	0.65	C3	0.78
Eucalyptus globulus
R1	0.18	C1	0.21
R2	0.22	C2	0.17
R3	0.34	C3	0.33
Ficus benjamina
R1	0.27	C1	0.35
R2	0.36	C2	0.47
R3	0.45	C3	0.51
Ficus religiosa
R1	0.24	C1	0.35
R2	0.43	C2	0.38
R3	0.31	C3	0.48
Ficus virens
R1	0.19	C1	0.21
R2	0.25	C2	0.3
R3	0.35	C3	0.37
Morus alba
R1	0.65	C1	0.58
R2	0.77	C2	0.67
R3	0.88	C3	0.79
Murraya paniculata
R1	0.39	C1	0.61
R2	0.55	C2	0.74
R3	0.61	C3	0.86
Putranjiva roxburghii
R1	0.42	C1	0.61
R2	0.58	C2	0.73
R3	0.68	C3	0.81
Polyalthia longifolia
R1	0.21	C1	0.31
R2	0.34	C2	0.43
R3	0.45	C3	0.51
Rubia tinctorum
R1	0.32	C1	0.42
R2	0.45	C2	0.53
R3	0.48	C3	0.59

## Sheet: Sheet7
Chlorophyll b
Alstonia scholaris	Polluted		Control
R1	0.23	C1	0.44
R2	0.35	C2	0.57
R3	0.45	C3	0.66
Bougainvillea spectabilis
R1	0.62	C1	1.09
R2	0.73	C2	1.15
R3	0.82	C3	1.19
Dalbergia sissoo
R1	0.6	C1	0.63
R2	0.71	C2	0.79
R3	0.81	C3	0.84
Eucalyptus globulus
R1	0.22	C1	0.23
R2	0.3	C2	0.29
R3	0.46	C3	0.39
Ficus benjamina
R1	0.49	C1	0.56
R2	0.57	C2	0.63
R3	0.69	C3	0.75
Ficus religiosa
R1	0.31	C1	0.47
R2	0.42	C2	0.58
R3	0.49	C3	0.62
Ficus virens
R1	0.33	C1	0.29
R2	0.45	C2	0.37
R3	0.55	C3	0.48
Morus alba
R1	0.78	C1	0.77
R2	0.89	C2	0.81
R3	0.98	C3	0.92
Murraya paniculata
R1	0.56	C1	0.79
R2	0.67	C2	0.85
R3	0.72	C3	0.97
Putranjiva roxburghii
R1	1.11	C1	1.25
R2	1.21	C2	1.36
R3	1.29	C3	1.44
Polyalthia longifolia
R1	0.42	C1	0.54
R2	0.57	C2	0.57
R3	0.68	C3	0.68
Rubia tinctorum
R1	0.41	C1	0.52
R2	0.56	C2	0.66
R3	0.62	C3	0.73

## Sheet: Sheet8
Total Chlorophyll
Alstonia scholaris	Polluted		Control
R1	0.35	C1	1.09
R2	0.47	C2	1.22
R3	0.52	C3	1.3
Bougainvillea spectabilis
R1	1.22	C1	2.15
R2	1.31	C2	2.23
R3	1.36	C3	2.27
Dalbergia sissoo
R1	0.46	C1	0.72
R2	0.57	C2	0.83
R3	0.67	C3	0.92
Eucalyptus globulus
R1	0.63	C1	0.56
R2	0.73	C2	0.66
R3	0.79	C3	0.73
Ficus benjamina
R1	0.71	C1	0.66
R2	0.82	C2	0.77
R3	0.89	C3	0.84
Ficus religiosa
R1	0.72	C1	0.65
R2	0.8	C2	0.76
R3	0.91	C3	0.86
Ficus virens
R1	0.53	C1	0.51
R2	0.62	C2	0.63
R3	0.77	C3	0.69
Morus alba
R1	1.61	C1	1.22
R2	1.82	C2	1.35
R3	1.98	C3	1.51
Murraya paniculata
R1	0.67	C1	1.09
R2	0.76	C2	1.13
R3	0.83	C3	1.21
Putranjiva roxburghii
R1	2.43	C1	2.21
R2	2.57	C2	2.33
R3	2.67	C3	2.47
Polyalthia longifolia
R1	0.31	C1	0.33
R2	0.42	C2	0.45
R3	0.51	C3	0.56
Rubia tinctorum
R1	0.58	C1	0.87
R2	0.65	C2	0.95
R3	0.78	C3	1.12

## Sheet: Sheet9
Carotenoid
Alstonia scholaris	Polluted		Control
R1	5.88	C1	6.74
R2	5.96	C2	6.67
R3	5.99	C3	7.22
Bougainvillea spectabilis
R1	5.05	C1	9.05
R2	6.07	C2	8.99
R3	7.01	C3	9.16
Dalbergia sissoo
R1	7.09	C1	11.12
R2	6.96	C2	11.17
R3	7.41	C3	11.24
Eucalyptus globulus
R1	9.12	C1	6.19
R2	9.14	C2	6.15
R3	9.1	C3	6.25
Ficus benjamina
R1	5.17	C1	5.17
R2	5.2	C2	5.29
R3	5.39	C3	5.21
Ficus religiosa
R1	5.07	C1	5.87
R2	4.95	C2	5.95
R3	4.99	C3	5.65
Ficus virens
R1	7.62	C1	7.09
R2	7.95	C2	7.17
R3	7.72	C3	7.24
Morus alba
R1	7.78	C1	7.14
R2	7.83	C2	7.11
R3	8.13	C3	7.3
Murraya paniculata
R1	4.28	C1	4.47
R2	3.98	C2	4.52
R3	4.11	C3	4.35
Putranjiva roxburghii
R1	7.54	C1	7.54
R2	7.5	C2	7.52
R3	7.78	C3	7.39
Polyalthia longifolia
R1	6.38	C1	7.49
R2	5.96	C2	7.37
R3	6.54	C3	7.42
Rubia tinctorum
R1	7.78	C1	9.58
R2	7.77	C2	9.79
R3	7.96	C3	9.71
